# Supplementary material for: Evaluation of Uncertainty Propagation Predictions in River Water Quality Modeling
Source: Research Square preprint supplement (doi:10.21203/rs.3.rs-386752/v1), 2021-04-19
Supplement: Supplementary file 1 [file 6635ba0356478ecef100856c.docx]

**Environmental Science and Pollution Research**

**Supplementary Data Material**

**Evaluation of uncertainty propagation predictions in river water quality modeling**

André Fonseca1*, Cidália Botelho2, Rui A.R. Boaventura2, Vítor J.P. Vilar2

1Centre for the Research and Technology of Agro-environmental and Biological Sciences – CITAB; Institute for Innovation, Capacity Building and Sustainability of Agri-food Production – Inov4Agro; Universidade de Trás-os-Montes e Alto Douro, UTAD, Vila Real, Portugal

*2*LSRE - Laboratory of Separation and Reaction Engineering – Associate Laboratory –LSRE-LCM, Department of Chemical Engineering, Faculty of Engineering of the University of Porto, Portugal

*** Corresponding Author**

Tel. +351 936168204; E-mail address: andrerdf@gmail.com (André R. Fonseca)

**Figures Caption**

**Figure S1.** Stream flow plots at Ave River station; a) daily calibration; b) daily validation; c) monthly calibration; d) monthly validation; – observed values; -- simulated values.

**Figure S2.** Stream flow plots at Este River station; a) daily calibration; b) daily validation; c) monthly calibration; d) monthly validation; – observed values; -- simulated values.

**Figure S3.** Calibration plots at Ave River Station; a) temperature; b) fecal coliforms; c) dissolved oxygen; d) biochemical oxygen demand; e) nitrates and f) orthophosphates; – monthly average; -- daily simulation; • observed values.

**Figure S4.** Validation plots at Ave River Station; a) temperature; b) fecal coliforms; c) dissolved oxygen; d) biochemical oxygen demand; e) nitrates and f) orthophosphates; – monthly average; -- daily simulation; • observed values.

**Figure S5.** Calibration plots at Este River Station; a) temperature; b) fecal coliforms; c) dissolved oxygen; d) biochemical oxygen demand; e) nitrates and f) orthophosphates; – monthly average; -- daily simulation; • observed values.

**Figure S6.** Validation plots at Este River Station; a) temperature; b) fecal coliforms; c) dissolved oxygen; d) biochemical oxygen demand; e) nitrates and f) orthophosphates; – monthly average; -- daily simulation; • observed values.

**Figure S1**

| **a)** |  |
| --- | --- |
| **b)** |  |
| **c)** |  |
| **d)** |  |

**Figure S2**

| **a)** |  |
| --- | --- |
| **b)** |  |
| **c)** |  |
| **d)** |  |

**Figure S3**

| **a)** | **b)** |
| --- | --- |
|  |  |
| **c)** | **d)** |
|  |  |
| **e)** | **f)** |
|  |  |

**Figure S4**

| **a)** | **b)** |
| --- | --- |
|  |  |
| **c)** | **d)** |
|  |  |
| **e)** | **f)** |
|  |  |

**Figure S5**

| **a)** | **b)** |
| --- | --- |
|  |  |
| **c)** | **d)** |
|  |  |
| **e)** | **f)** |
|  |  |

**Figure S6**

| **a)** | **b)** |
| --- | --- |
|  |  |
| **c)** | **d)** |
|  |  |
| **e)** | **f)** |
|  |  |
